# Supplementary material for: Silica-assisted incorporation of polydopamine into the framework of porous nanocarriers by a facile one-pot synthesis
Source: Royal Society of Chemistry journal article supplement (doi:10.1039/c5tb02784e), 2016-01-01
Supplement: c5tb02784e1.pdf [file c5tb02784e1.pdf]

## Supplementary Information

### **Silica-assisted incorporation of polydopamine into the framework of porous nanocarriers by a facile one-pot synthesis**

Xianying Zheng, Feng Chen, Jixi Zhang\*, Kaiyong Cai\*

Key Laboratory of Biorheological Science and Technology, Ministry of Education, College of Bioengineering, Chongqing University. E-mail: jixizhang@cqu.edu.cn

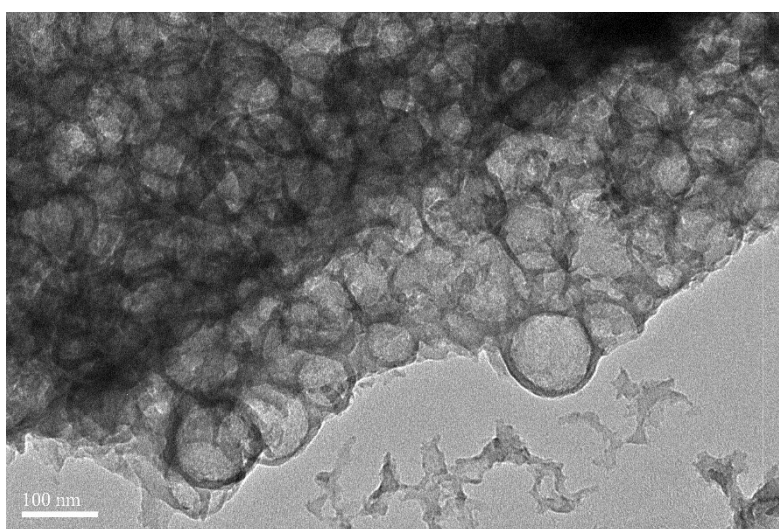

**Fig. S1** TEM image of PDA-MSN particles after carbonization and subsequent etching by HF.

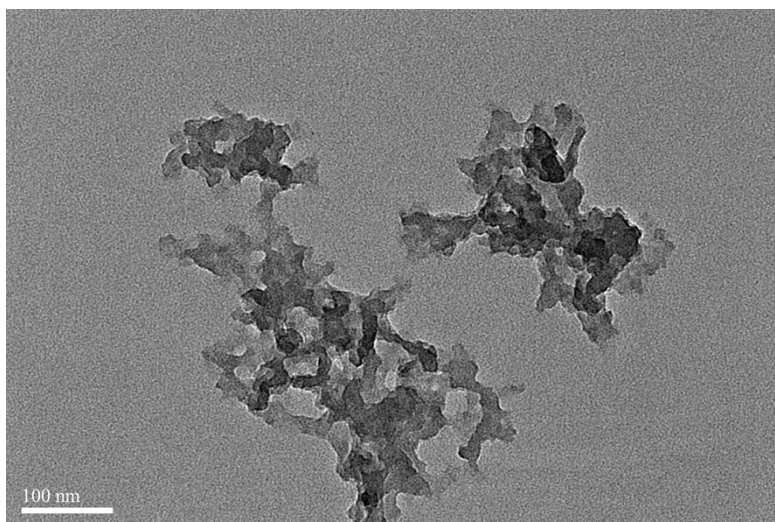

**Fig. S2** TEM image of PDA-MSN particles after etching by HF.

**Table. S1** Comparison of textual parameters for MSN, PDA-MSN, and carbonized PDA-MSN.

|                    | Surface area | C-value | Peak pore size |
|--------------------|--------------|---------|----------------|
| MSN                | 963          | 85      | 3.8            |
| PDA-MSN-1          | 900          | 50      | 4.3            |
| PDA-MSN-2          | 830          | 49      | 4.3            |
| PDA-MSN-2          | 880          | 51      | 4.3            |
| Carbonized PDA-MSN | 1048         | 70      | 3.7            |

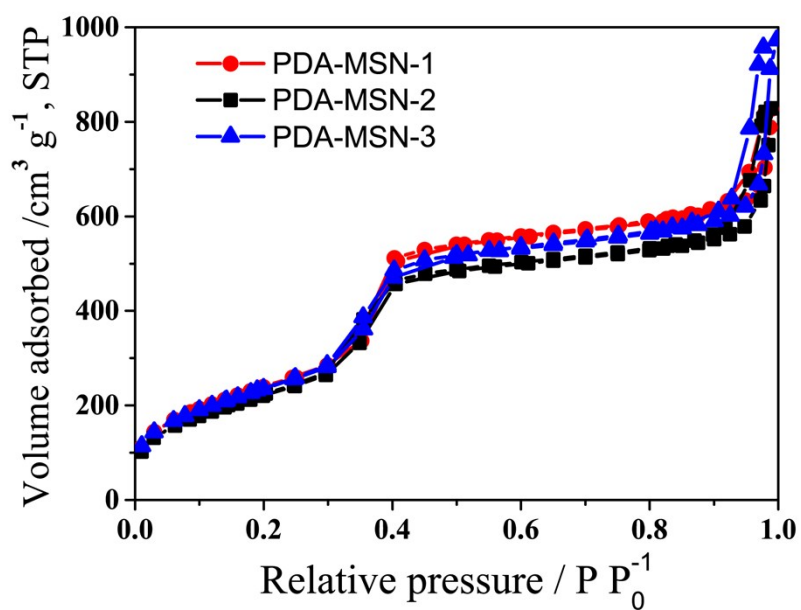

**Fig. S3** Comparison of nitrogen sorption isotherms for MSN-PDA particles synthesized with varying dopamine ratio in the reaction solution (1, 2, 3 represents 1.25, 2.5, and 5 mol%,

respectively).

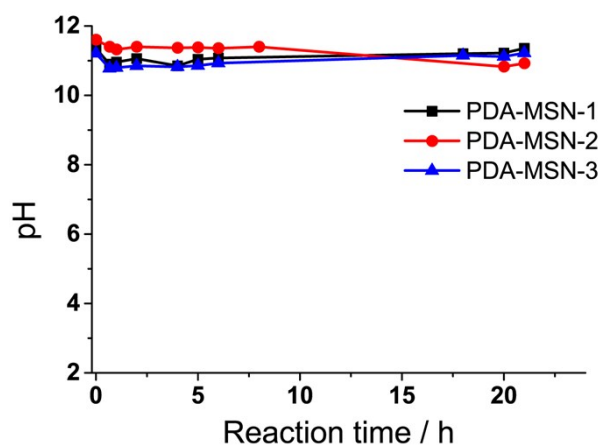

**Fig. S4** In situ pH values of the reaction solutions for PDA-MSN-1, PDA-MSN-2, and PDA-MSN-3.

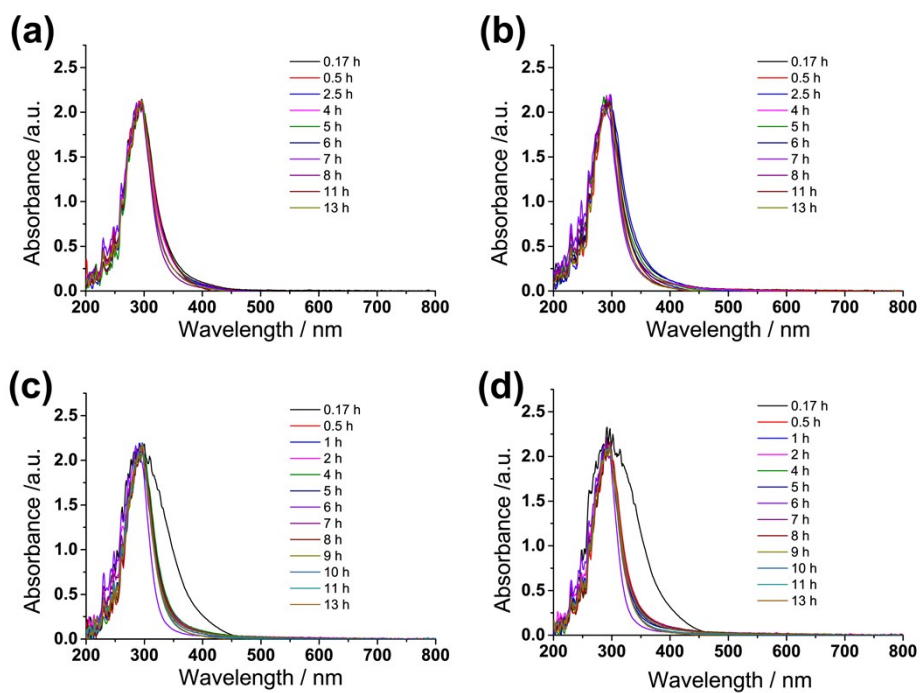

**Fig. S5** In situ evolution of the UV-vis absorption spectra of the solutions in the molybdosilicate method for MSN (a), PDA-MSN-1 (b), PDA-MSN-2 (c), PDA-MSN-3 (d).

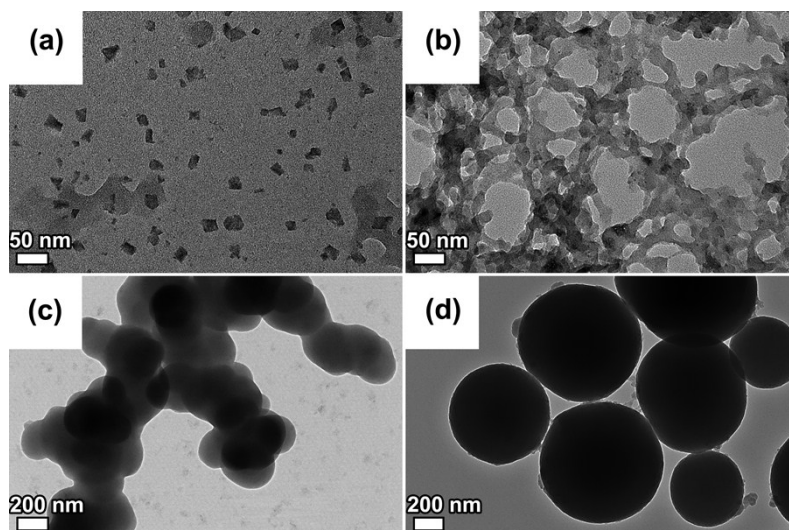

**Fig. S6** Comparison of nitrogen sorption isotherms for PDA particles synthesized with fixed reaction conditions of PDA-MSN (in the absence of TEOS), while varying ethanol/water volume ratio in the reaction solution (a, b, c, and d represents 30/150, 40/140, 60/120 and 80/100, respectively).

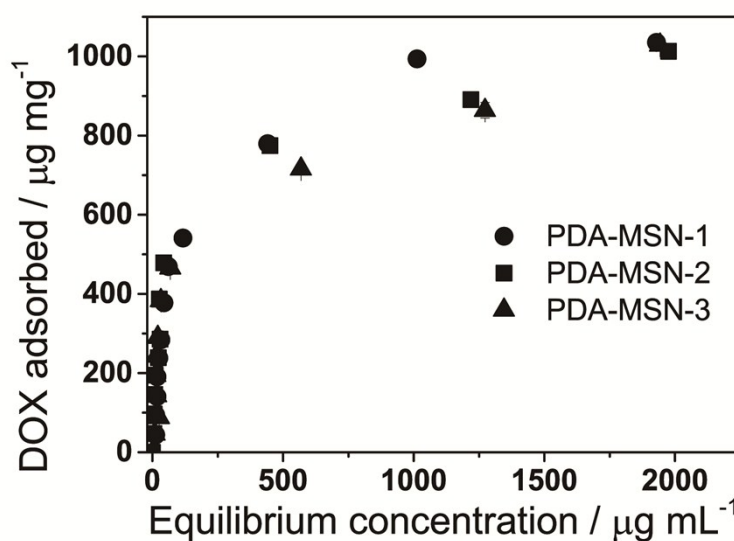

**Fig. S7** Comparison of DOX adsorption isotherms for MSN-PDA particles synthesized with varying dopamine ratio in the reaction solution (1, 2, 3 represents 1.25, 2.5, and 5 mol%, respectively).
